# Supplementary material
Source: publisher figshare collection journal article supplement (https://gsapubs.figshare.com/ndownloader/files/34244222)
Supplement: Supplementary file 1 [file 34244222]

## Sheet: Sheet1
Table S2. LA-ICP-MS results for zircon U-Pb ages of igneous and sedimentary samples in this study
Sample Analysis Spot				Corrected Isotopic Ratios						Corrected Ages (Ma)									Wu, C., Li, J., Zuza, A.V., Haproff, P.J., Yin, A., and Ding, L., 2022, Paleoproterozoic–Paleozoic tectonic evolution of the Longshou Shan, western North China craton: Geosphere, v. 18, no. X, p. XXX–XXX, https://doi.org/10.1130/GES02491.1
number	Th (ppm)	U (ppm)	Th/U	206Pb/238U	1σ	207Pb/235U	1σ	207Pb/206Pb	1σ	206Pb/238U	1σ	207Pb/235U	1σ	207Pb/206Pb	1σ	Best Ages	1σ
Pink granitoid sample WC09-15-14(4a)
sam.01	125.64	230.75	0.544485	0.45598	0.00653	9.75549	0.18556	0.15519	0.0028	2422	29	2412	18	2404	15	2404	15
sam.02	71.68	176.45	0.406234	0.45298	0.00619	9.63424	0.16421	0.15427	0.00244	2408	27	2400	16	2394	13	2394	13
sam.03	99.65	473.07	0.210645	0.34534	0.00437	5.58143	0.07921	0.11722	0.00148	1912	21	1913	12	1914	11	1914	11
sam.04	69.07	195.66	0.35301	0.45988	0.00594	9.61482	0.13944	0.15163	0.00196	2439	26	2399	13	2364	11	2364	11
sam.05	102.19	278.23	0.367286	0.44244	0.00562	9.26022	0.12653	0.15179	0.00182	2362	25	2364	13	2366	10	2366	10
sam.06	105.64	290.04	0.364226	0.3956	0.00511	7.36603	0.10963	0.13503	0.00181	2149	24	2157	13	2164	12	2164	12
sam.07	76.86	209.98	0.366035	0.45351	0.00597	9.67168	0.14772	0.15465	0.00214	2411	26	2404	14	2398	12	2398	12
sam.08	76.09	226.38	0.336116	0.45113	0.00602	9.63445	0.1527	0.15486	0.00225	2400	27	2400	15	2400	12	2400	12
sam.09	113.57	235.33	0.482599	0.45639	0.00583	9.59679	0.1331	0.15247	0.00187	2424	26	2397	13	2374	11	2374	11
sam.10	71.71	164.91	0.434843	0.46169	0.00606	9.18025	0.14018	0.14417	0.002	2447	27	2356	14	2278	12	2278	12
sam.11	127.66	245.03	0.520997	0.44956	0.00576	9.51715	0.13246	0.15347	0.00189	2393	26	2389	13	2385	11	2385	11
sam.12	98.41	229.18	0.4294	0.42452	0.00548	8.44002	0.12182	0.14412	0.00186	2281	25	2279	13	2277	11	2277	11
sam.13	85.25	218.88	0.389483	0.44775	0.00572	9.1239	0.12608	0.14771	0.0018	2385	25	2351	13	2320	11	2320	11
sam.14	138.4	255.32	0.542065	0.43788	0.00562	8.97268	0.12586	0.14853	0.00185	2341	25	2335	13	2329	11	2329	11
sam.15	136.03	338.19	0.40223	0.43722	0.00562	8.91565	0.12504	0.1478	0.00184	2338	25	2329	13	2321	11	2321	11
sam.16	165.38	475.33	0.347927	0.45028	0.00655	9.53784	0.18525	0.15352	0.00284	2396	29	2391	18	2386	16	2386	16
sam.17	130.49	515.36	0.253202	0.33436	0.00423	5.18507	0.07155	0.11239	0.00137	1859	20	1850	12	1838	11	1838	11
sam.18	68.18	585.57	0.116434	0.35167	0.00441	5.73099	0.07563	0.1181	0.00136	1943	21	1936	11	1928	11	1928	11
sam.19	91.23	232.05	0.393148	0.42201	0.00546	7.91462	0.11644	0.13592	0.0018	2270	25	2221	13	2176	11	2176	11
sam.20	97.21	214.73	0.452708	0.45817	0.00589	9.31466	0.12962	0.14733	0.00182	2431	26	2369	13	2315	11	2315	11
sam.21	228.21	422.93	0.539593	0.45191	0.00694	9.59065	0.20735	0.15377	0.00321	2404	31	2396	20	2388	18	2388	18
sam.22	60.3	182.4	0.330592	0.42286	0.0056	8.19214	0.1266	0.14037	0.00199	2273	25	2252	14	2232	12	2232	12
sam.23	80.48	191.63	0.419976	0.44065	0.00571	8.93375	0.12741	0.14689	0.00188	2354	26	2331	13	2310	11	2310	11
sam.24	79.84	188.43	0.423712	0.45857	0.00599	9.27145	0.13552	0.14648	0.00193	2433	26	2365	13	2305	11	2305	11
sam.25	159.26	295.4	0.539133	0.4328	0.00559	9.7981	0.13568	0.16401	0.00202	2318	25	2416	13	2497	10	2497	10
sam.26	68.15	152.45	0.447032	0.45657	0.00596	9.43539	0.13675	0.14971	0.00195	2424	26	2381	13	2343	11	2343	11
sam.27	56.22	140.3	0.400713	0.46252	0.00654	9.22033	0.16778	0.14442	0.00248	2451	29	2360	17	2281	15	2281	15
sam.28	152.18	363.51	0.41864	0.4409	0.00566	8.94376	0.12249	0.14695	0.00178	2355	25	2332	13	2311	11	2311	11
sam.29	110.13	253.33	0.434729	0.42484	0.00636	8.37363	0.17556	0.14278	0.00289	2282	29	2272	19	2261	18	2261	18
sam.30	51.13	757.53	0.0674957	0.05361	0.00129	0.48588	0.04145	0.06574	0.00583	337	8	402	28	798	193	/	/
sam.31	154.04	298.7	0.515701	0.45487	0.00582	8.89039	0.11967	0.14156	0.00168	2417	26	2327	12	2246	10	2246	10
sam.32	76.63	894.75	0.085644	0.29409	0.00373	4.15959	0.05749	0.10244	0.00126	1662	19	1666	11	1669	11	1669	11
sam.33	117.49	207.49	0.566244	0.4508	0.00584	9.06231	0.12665	0.14559	0.00182	2399	26	2344	13	2295	11	2295	11
sam.34	197.49	515.04	0.383446	0.41461	0.00525	7.98114	0.10283	0.13941	0.00156	2236	24	2229	12	2220	10	2220	10
sam.35	122.19	311.66	0.392062	0.40191	0.00517	7.5185	0.10381	0.13548	0.00167	2178	24	2175	12	2170	11	2170	11
Granitoid sample WC09-16-14(3)
sam.01	82.19	994.26	0.0826645	0.20125	0.00236	2.717	0.05015	0.09791	0.00214	1182	13	1333	14	1585	42	1585	42
sam.02	80.28	1155.06	0.0695029	0.22203	0.00241	3.02336	0.04061	0.09876	0.00171	1293	13	1414	10	1601	33	1601	33
sam.03	113.35	1041.9	0.108792	0.15677	0.00185	2.12605	0.04072	0.09836	0.00221	939	10	1157	13	1593	43	939	10
sam.04	1098.6	1658.97	0.662218	0.2056	0.00366	2.37708	0.19605	0.08385	0.00708	1205	20	1236	59	1289	170	1289	170
sam.05	81.16	1041.59	0.0779193	0.15992	0.00182	2.0324	0.03696	0.09217	0.00198	956	10	1126	12	1471	42	956	10
sam.06	43.4	923.93	0.0469733	0.1662	0.00186	2.13441	0.03568	0.09314	0.00187	991	10	1160	12	1491	39	991	10
sam.07	158.58	1400.47	0.113233	0.19063	0.00217	2.67383	0.04428	0.10173	0.00204	1125	12	1321	12	1656	38	1656	38
sam.08	75.05	945.51	0.0793752	0.24261	0.00271	3.49913	0.05429	0.10461	0.002	1400	14	1527	12	1707	36	1707	36
sam.09	53.98	924.45	0.0583915	0.16486	0.00199	2.0977	0.04645	0.09229	0.00233	984	11	1148	15	1473	49	984	11
sam.10	92.41	1154.59	0.0800371	0.18786	0.00264	2.43353	0.07167	0.09395	0.00307	1110	14	1253	21	1507	63	1507	63
sam.11	190.98	1685.72	0.113293	0.20967	0.00231	2.84428	0.04	0.09839	0.00176	1227	12	1367	11	1594	34	1594	34
sam.12	70.9	973.8	0.0728076	0.2017	0.00226	2.61748	0.04287	0.09412	0.00187	1184	12	1306	12	1510	38	1510	38
sam.13	103.11	1835.7	0.0561693	0.1123	0.00154	2.75963	0.05928	0.17839	0.00396	686	9	1345	16	2638	19	686	9
sam.14	231.27	1929.32	0.119871	0.12728	0.00179	3.56093	0.07603	0.2031	0.0045	772	10	1541	17	2851	18	772	10
sam.15	1216.61	1673.03	0.72719	0.12877	0.00227	2.56034	0.13509	0.1442	0.00802	781	13	1289	39	2278	98	781	13
sam.16	111.06	1109.4	0.100108	0.16126	0.00234	2.04145	0.07611	0.09181	0.00367	964	13	1129	25	1464	78	964	13
sam.17	78.88	1008.36	0.078226	0.20795	0.00243	2.80886	0.05868	0.09796	0.00235	1218	13	1358	16	1586	46	1586	46
sam.18	80.13	1566.65	0.0511474	0.20792	0.00457	2.43882	0.15765	0.08507	0.00581	1218	24	1254	47	1317	136	1317	136
sam.19	79.34	1112.75	0.0713008	0.17072	0.00224	2.26029	0.07468	0.09602	0.00341	1016	12	1200	23	1548	68	1548	68
sam.20	97.06	997.79	0.097275	0.2221	0.00347	3.10682	0.12313	0.10145	0.00432	1293	18	1434	30	1651	81	1651	81
sam.21	97.28	2072.72	0.0469335	0.15309	0.00179	1.67666	0.03332	0.07943	0.00183	918	10	1000	13	1183	47	918	10
sam.22	76.87	1874.73	0.0410032	0.18892	0.00285	1.93404	0.06879	0.07433	0.00268	1116	15	1093	24	1050	47	1050	47
sam.23	54.1	1080.31	0.0500782	0.15879	0.00176	2.13186	0.03293	0.09737	0.00185	950	10	1159	11	1574	36	950	10
sam.24	54.58	1052.73	0.0518462	0.29398	0.00391	4.72227	0.11631	0.1165	0.00326	1661	19	1771	21	1903	51	1903	51
sam.25	40.95	867.1	0.0472264	0.18179	0.00295	2.44386	0.1031	0.0975	0.00441	1077	16	1256	30	1577	87	1577	87
sam.26	20.59	792.98	0.0259653	0.16714	0.00209	2.46606	0.05594	0.10701	0.00277	996	12	1262	16	1749	49	996	12
sam.27	41.9	661.82	0.0633103	0.20684	0.00315	3.1635	0.10831	0.11093	0.00416	1212	17	1448	26	1815	70	1815	70
sam.28	90.16	1189.33	0.0758074	0.19062	0.00268	2.60287	0.07349	0.09903	0.00312	1125	15	1301	21	1606	60	1606	60
sam.29	176.62	1283.92	0.137563	0.12791	0.00319	1.41693	0.21978	0.08034	0.01262	776	18	896	92	1205	332	776	18
sam.30	551.16	1600.91	0.344279	0.13127	0.00217	3.14966	0.17034	0.17402	0.00984	795	12	1445	42	2597	97	795	12
sam.31	152.54	1581.57	0.0964485	0.12233	0.00166	1.91959	0.08834	0.11381	0.00546	744	10	1088	31	1861	89	744	10
sam.32	70.73	1438.92	0.0491549	0.16184	0.00225	2.02185	0.06453	0.09061	0.00316	967	13	1123	22	1438	68	967	13
sam.33	61.69	1058.43	0.0582844	0.16537	0.00194	2.1222	0.04526	0.09308	0.00227	987	11	1156	15	1489	47	987	11
sam.34	327.41	1286.42	0.254513	0.16994	0.00275	2.0691	0.10582	0.0883	0.00474	1012	15	1139	35	1389	106	1389	106
sam.35	350.61	1424.9	0.246059	0.12852	0.00165	1.81068	0.06879	0.10218	0.0041	779	9	1049	25	1664	76	779	9
Granitoid sample WC09-17-14(2b)
sam.01	5.34	45	0.118667	0.07603	0.00346	0.59289	0.1242	0.05658	0.01205	472	21	473	79	475	366	472	21
sam.02	6.61	27.74	0.238284	0.0747	0.00511	0.58335	0.21282	0.05666	0.02094	464	31	467	136	478	579	464	31
sam.03	8.19	22.69	0.360952	0.07552	0.00449	0.5893	0.20279	0.05661	0.0197	469	27	470	130	476	553	469	27
sam.04	6.83	10.59	0.644948	0.06994	0.00832	0.54847	0.38064	0.05689	0.03994	436	50	444	250	487	1040	436	50
sam.05	26.04	29.39	0.886016	0.30628	0.00708	4.44527	0.23971	0.10529	0.00575	1722	35	1721	45	1719	65	1719	65
sam.06	10.93	23.74	0.460404	0.07606	0.0059	0.60415	0.27458	0.05762	0.02648	473	35	480	174	515	731	473	35
sam.07	17.45	25.03	0.697163	0.31329	0.02851	4.59596	1.1029	0.10642	0.02612	1757	140	1749	200	1739	320	1739	320
sam.08	26.8	29.97	0.894228	0.31012	0.01121	4.56764	0.41463	0.10685	0.00989	1741	55	1743	76	1746	114	1746	114
sam.09	16.36	31.87	0.513335	0.22345	0.01271	2.61173	0.46466	0.08479	0.01542	1300	67	1304	131	1311	264	1311	264
sam.10	31.87	32.56	0.978808	0.17777	0.01073	1.82636	0.3715	0.07453	0.0155	1055	59	1055	133	1056	326	1056	326
sam.11	24.47	31.25	0.78304	0.16498	0.00914	1.64728	0.31363	0.07243	0.0141	984	51	989	120	998	308	984	51
sam.12	11.45	76.06	0.150539	0.08909	0.00573	0.7175	0.19433	0.05842	0.01614	550	34	549	115	546	445	550	34
sam.13	36.56	43.7	0.836613	0.17373	0.01474	1.80579	0.52948	0.0754	0.02261	1033	81	1048	192	1079	488	1079	488
sam.14	23.61	26.14	0.903213	0.29519	0.01531	4.14965	0.58232	0.10198	0.01462	1667	76	1664	115	1660	185	1660	185
sam.15	13.87	33.44	0.414773	0.0805	0.00339	0.63666	0.11908	0.05738	0.01091	499	20	500	74	506	339	499	20
sam.16	38.51	85.74	0.449149	0.24257	0.00674	4.28675	0.26945	0.1282	0.00827	1400	35	1691	52	2073	72	/	/
sam.17	24.25	89.64	0.270527	0.20828	0.0111	2.34062	0.38455	0.08152	0.01371	1220	59	1225	117	1234	244	1234	244
sam.18	38.88	53.26	0.730004	0.32189	0.0067	4.8749	0.22005	0.10986	0.00499	1799	33	1798	38	1797	52	1797	52
sam.19	4.3	35.81	0.120078	0.08149	0.00266	0.63677	0.09951	0.05668	0.00898	505	16	500	62	479	291	505	16
sam.20	21.73	31.8	0.683333	0.29258	0.01207	4.13384	0.45765	0.1025	0.01158	1654	60	1661	91	1670	144	1670	144
sam.21	18.1	35.73	0.506577	0.26444	0.00912	3.44903	0.32562	0.09462	0.00911	1513	46	1516	74	1521	126	1521	126
sam.22	12.06	18.08	0.667035	0.07228	0.0046	0.56412	0.21783	0.05662	0.02209	450	28	454	141	477	621	450	28
sam.23	4.68	25.72	0.18196	0.07808	0.00305	0.60262	0.13605	0.05599	0.01277	485	18	479	86	452	393	485	18
sam.24	20.42	24.17	0.844849	0.23651	0.01361	2.8098	0.51257	0.08619	0.01605	1369	71	1358	137	1342	271	1342	271
sam.25	12.63	24.05	0.525156	0.08716	0.01621	1.19303	0.71862	0.0993	0.06195	539	96	797	333	1611	1012	/	/
sam.26	42.91	45.64	0.940184	-0.4536	0.01047	2.05102	0.12324	-0.0328	0.00202	-3896	124	1133	41	-530	75	/	/
sam.27	5.87	29.84	0.196716	0.09216	0.0037	0.75281	0.15395	0.05926	0.01227	568	22	570	89	577	378	568	22
sam.28	19.16	34.07	0.562372	0.21392	0.01444	2.40984	0.50805	0.08173	0.01764	1250	77	1246	151	1239	320	1239	320
sam.29	18.19	51.32	0.354443	0.14312	0.00537	1.35526	0.17812	0.0687	0.00922	862	30	870	77	890	213	862	30
sam.30	6.84	20.08	0.340637	0.06907	0.00968	0.53664	0.45776	0.05637	0.0486	431	58	436	302	467	1203	431	58
sam.31	7.27	20.17	0.360436	0.09375	0.00345	0.76126	0.17723	0.05891	0.01382	578	20	575	102	564	419	578	20
sam.32	8.83	16.17	0.546073	0.0822	0.00505	0.64999	0.22142	0.05738	0.01978	509	30	508	136	506	549	509	30
sam.33	6.88	73.68	0.0933768	0.07891	0.00183	0.61548	0.05802	0.05659	0.0054	490	11	487	36	476	169	490	11
sam.34	35.94	31.95	1.12488	0.1884	0.01598	2.10236	0.57463	0.08097	0.02269	1113	87	1150	188	1221	437	1221	437
sam.35	36.78	41.79	0.880115	0.25274	0.01619	3.19229	0.59008	0.09165	0.01735	1453	83	1455	143	1460	261	1460	261
Volcanic sample WC09-17-14(2c)
sam.01	40.45	152.25	0.265681	0.24486	0.0091	3.104	0.31627	0.09192	0.00958	1412	47	1434	78	1466	138	1466	138
sam.02	112.92	135.68	0.832252	0.24557	0.01102	2.98748	0.38139	0.08821	0.01152	1416	57	1404	97	1387	178	1387	178
sam.03	59.49	117.59	0.50591	0.07256	0.00274	0.57485	0.08739	0.05745	0.00891	452	16	461	56	509	271	452	16
sam.04	55.62	136.1	0.40867	0.31115	0.00558	4.57077	0.16356	0.10652	0.00381	1746	27	1744	30	1741	40	1741	40
sam.05	21.61	55.23	0.391273	0.32248	0.00662	4.90363	0.21978	0.11026	0.00497	1802	32	1803	38	1804	52	1804	52
sam.06	69.26	219	0.316256	0.23652	0.00996	2.87171	0.3451	0.08804	0.01082	1369	52	1375	91	1383	167	1383	167
sam.07	62.89	105.45	0.596396	0.42542	0.00677	8.59534	0.2116	0.1465	0.00348	2285	31	2296	22	2305	22	2305	22
sam.08	66.17	95.77	0.690926	0.14917	0.00997	1.9544	0.38874	0.095	0.01951	896	56	1100	134	1528	283	/	/
sam.09	382	930.28	0.410629	0.20617	0.00383	2.87409	0.13374	0.10111	0.00507	1208	20	1375	35	1645	95	/	/
sam.10	42.23	121.73	0.346915	0.25824	0.01275	3.29004	0.45186	0.09238	0.01299	1481	65	1479	107	1475	188	1475	188
sam.11	37.52	91.64	0.409428	0.35722	0.01275	5.91387	0.4868	0.12004	0.01006	1969	61	1963	71	1957	96	1957	96
sam.12	84.89	126.39	0.671651	0.08997	0.00256	0.73449	0.07683	0.05919	0.00631	555	15	559	45	574	180	555	15
sam.13	50.36	82.29	0.611982	0.08946	0.00647	0.73999	0.21672	0.05998	0.01795	552	38	562	126	603	479	552	38
sam.14	52.59	134.16	0.391995	0.18207	0.0082	1.81632	0.2712	0.07233	0.01103	1078	45	1051	98	995	235	995	235
sam.15	25.13	73.68	0.341069	0.13501	0.00949	1.21211	0.31813	0.0651	0.01746	816	54	806	146	778	441	816	54
sam.16	92.57	138.13	0.670166	0.36645	0.01177	6.28465	0.4455	0.12435	0.00896	2013	56	2016	62	2020	80	2020	80
sam.17	46.41	129.95	0.357137	0.33034	0.00752	5.15429	0.25334	0.11313	0.00562	1840	36	1845	42	1850	56	1850	56
sam.18	100.3	145.07	0.69139	0.07721	0.00151	0.61023	0.04136	0.05731	0.00393	479	9	484	26	503	115	479	9
sam.19	43.84	122.42	0.358111	0.331	0.00539	5.13236	0.14732	0.11242	0.00316	1843	26	1841	24	1839	29	1839	29
sam.20	60.33	165.36	0.36484	0.3178	0.00587	4.79349	0.17621	0.10936	0.00401	1779	29	1784	31	1789	40	1789	40
sam.21	59.5	101.53	0.586034	0.39307	0.0132	7.25599	0.51755	0.13385	0.0097	2137	61	2143	64	2149	78	2149	78
sam.22	124.73	170.6	0.731125	0.28007	0.00883	3.98782	0.31271	0.10324	0.00827	1592	44	1632	64	1683	98	1683	98
sam.23	53.21	121.31	0.438628	0.31876	0.00742	4.85058	0.24954	0.11033	0.00574	1784	36	1794	43	1805	60	1805	60
sam.24	29.89	98.1	0.304689	0.32992	0.00786	5.14756	0.26855	0.11313	0.00597	1838	38	1844	44	1850	60	1850	60
sam.25	36	131.27	0.274244	0.29782	0.00712	4.22273	0.23443	0.1028	0.00578	1680	35	1678	46	1675	67	1675	67
sam.26	46.71	139.62	0.334551	0.15983	0.00507	1.91884	0.17672	0.08705	0.00822	956	28	1088	61	1362	129	/	/
sam.27	40.55	79.82	0.508018	0.41607	0.00988	8.10069	0.36884	0.14117	0.00646	2243	45	2242	41	2242	47	2242	47
sam.28	49.15	90.64	0.542255	0.14713	0.00813	1.37502	0.2712	0.06777	0.01366	885	46	878	116	862	331	885	46
sam.29	79.2	128.14	0.618074	0.08284	0.00357	0.66989	0.11346	0.05863	0.01014	513	21	521	69	553	300	513	21
sam.30	39.13	68.33	0.572662	0.11287	0.00595	1.00449	0.20064	0.06453	0.01317	689	34	706	102	759	345	689	34
sam.31	44.63	136.77	0.326314	0.28056	0.00681	4.03177	0.22775	0.1042	0.00598	1594	34	1641	46	1700	68	1700	68
sam.32	55.95	143.12	0.390931	0.32448	0.00533	4.99129	0.14402	0.11154	0.00315	1812	26	1818	24	1825	29	1825	29
sam.33	33.36	82.77	0.403045	0.34409	0.00627	5.61326	0.19232	0.11829	0.00402	1906	30	1918	30	1931	36	1931	36
sam.34	14.16	65.56	0.215985	0.1394	0.00645	1.25363	0.20927	0.06521	0.01112	841	36	825	94	781	281	841	36
sam.35	5.34	33.47	0.159546	0.07757	0.00505	0.62412	0.18035	0.05834	0.01717	482	30	492	113	543	467	482	30
K-feldspar granite sample WC09-17-14(4a)
sam.01	176.29	325.59	0.541448	0.0466	0.00157	0.35957	0.04773	0.05594	0.00759	294	10	312	36	450	236	294	10
sam.02	115.6	181.22	0.637899	0.048	0.00103	0.35834	0.02709	0.05413	0.00417	302	6	311	20	376	132	302	6
sam.03	237.39	345.89	0.686316	0.0512	0.00104	0.3613	0.02559	0.05116	0.00368	322	6	313	19	248	124	322	6
sam.04	463.02	520.24	0.890012	0.05146	0.0008	0.37219	0.01518	0.05244	0.00215	323	5	321	11	305	64	323	5
sam.05	297.69	411.31	0.723761	0.04836	0.00081	0.35703	0.01725	0.05353	0.00261	304	5	310	13	351	79	304	5
sam.06	87.74	160.51	0.546633	0.04981	0.00107	0.36457	0.02893	0.05307	0.00428	313	7	316	22	332	141	313	7
sam.07	183.37	345.76	0.530339	0.05091	0.00084	0.36535	0.01798	0.05205	0.00258	320	5	316	13	288	82	320	5
sam.08	114.41	268.38	0.426299	0.05066	0.00088	0.36514	0.02003	0.05227	0.0029	319	5	316	15	297	93	319	5
sam.09	225.47	280.76	0.80307	0.05064	0.00184	0.37337	0.05434	0.05347	0.00795	318	11	322	40	349	261	318	11
sam.10	106.81	182.5	0.58526	0.04708	0.00129	0.34718	0.03764	0.05348	0.00591	297	8	303	28	349	194	297	8
sam.11	311.17	430.38	0.723012	0.05005	0.0009	0.3634	0.02034	0.05266	0.00299	315	6	315	15	314	95	315	6
sam.12	106.74	169.33	0.630367	0.04938	0.00113	0.35245	0.0314	0.05177	0.00469	311	7	307	24	275	159	311	7
sam.13	911.69	658.77	1.38393	0.04984	0.00076	0.36348	0.01355	0.05289	0.00197	314	5	315	10	324	57	314	5
sam.14	345.93	439.7	0.786741	0.05315	0.00084	0.38008	0.01642	0.05187	0.00225	334	5	327	12	280	70	334	5
sam.15	213.18	340.4	0.626263	0.05037	0.00101	0.35208	0.02472	0.0507	0.00361	317	6	306	19	227	123	317	6
sam.16	256.69	342.23	0.750051	0.04701	0.00081	0.34307	0.01819	0.05293	0.00283	296	5	299	14	326	89	296	5
sam.17	133.37	213.4	0.624977	0.04958	0.00091	0.35951	0.02185	0.05259	0.00324	312	6	312	16	311	105	312	6
sam.18	336.69	401.15	0.839312	0.04906	0.00081	0.35368	0.01709	0.05229	0.00255	309	5	307	13	298	80	309	5
sam.19	196.53	304.48	0.645461	0.05248	0.00111	0.38316	0.02872	0.05296	0.00403	330	7	329	21	327	132	330	7
sam.20	62.93	138.03	0.455915	0.05091	0.0011	0.38053	0.0302	0.05422	0.00437	320	7	327	22	380	140	320	7
sam.21	1594.32	885.87	1.79972	0.04953	0.00096	0.51743	0.02674	0.07578	0.004	312	6	423	18	1089	72	312	6
sam.22	219.97	349.25	0.629835	0.04806	0.00147	0.34478	0.04176	0.05204	0.00643	303	9	301	32	287	216	303	9
sam.23	143.77	209.51	0.68622	0.04827	0.00116	0.35	0.03291	0.05259	0.00503	304	7	305	25	311	168	304	7
sam.24	181.16	368.19	0.492029	0.04932	0.00084	0.34754	0.01829	0.05111	0.00271	310	5	303	14	246	90	310	5
sam.25	176.23	286.26	0.615629	0.05184	0.00094	0.37296	0.02173	0.05219	0.00308	326	6	322	16	294	100	326	6
sam.26	209.8	295.52	0.709935	0.05234	0.00107	0.37204	0.02592	0.05156	0.00365	329	7	321	19	266	122	329	7
sam.27	151.51	243.15	0.623113	0.04979	0.00116	0.36584	0.03198	0.0533	0.00474	313	7	317	24	342	156	313	7
sam.28	149.18	279.11	0.534485	0.04995	0.0009	0.35763	0.0209	0.05194	0.00307	314	6	310	16	283	101	314	6
sam.29	320.35	485.46	0.65989	0.05124	0.00105	0.36147	0.0256	0.05118	0.00368	322	6	313	19	249	124	322	6
sam.30	336.45	437.02	0.769873	0.05078	0.00172	0.36025	0.04868	0.05146	0.0071	319	11	312	36	261	242	319	11
sam.31	166.44	300.32	0.554209	0.04956	0.00093	0.34749	0.02243	0.05086	0.00332	312	6	303	17	234	114	/	/
sam.32	124.44	214.26	0.58079	0.05149	0.00108	0.35677	0.02758	0.05026	0.00394	324	7	310	21	207	137	324	7
sam.33	178.06	294.99	0.603614	0.0508	0.0009	0.3595	0.02043	0.05134	0.00294	319	6	312	15	256	98	319	6
sam.34	345.66	423.68	0.815852	0.05131	0.00088	0.37101	0.01888	0.05245	0.00269	323	5	320	14	305	85	323	5
sam.35	175.28	250.26	0.700392	0.05324	0.00096	0.3789	0.02272	0.05162	0.00313	334	6	326	17	269	105	334	6
Grey granitoid sample WC09-17-14(4b)
sam.01	613.61	527.97	1.16221	0.04911	0.00102	0.35907	0.02508	0.05302	0.00376	309	6	312	19	330	121	309	6
sam.02	101.17	163.84	0.617493	0.04834	0.00105	0.35551	0.02997	0.05333	0.00456	304	6	309	22	343	152	304	6
sam.03	143.05	205.92	0.694687	0.04862	0.00118	0.35144	0.03216	0.05242	0.00488	306	7	306	24	304	163	306	7
sam.04	516.51	567.23	0.910583	0.04642	0.00088	0.34631	0.02037	0.05411	0.00323	293	5	302	15	376	98	293	5
sam.05	766.26	723.59	1.05897	0.0502	0.0009	0.36824	0.02005	0.0532	0.00293	316	6	318	15	337	91	316	6
sam.06	199.01	348.69	0.570736	0.04705	0.00081	0.33868	0.01774	0.0522	0.00276	296	5	296	13	294	88	296	5
sam.07	276.63	385.06	0.718408	0.04906	0.00097	0.35396	0.02316	0.05233	0.00348	309	6	308	17	300	113	309	6
sam.08	259.87	407.06	0.638407	0.0489	0.00086	0.35601	0.0187	0.0528	0.0028	308	5	309	14	320	87	308	5
sam.09	195.61	362.09	0.540225	0.04803	0.00084	0.34658	0.01876	0.05233	0.00286	302	5	302	14	300	91	302	5
sam.10	166.11	303.13	0.547983	0.05025	0.0014	0.36411	0.03924	0.05256	0.00577	316	9	315	29	310	192	316	9
sam.11	198.89	342.38	0.580904	0.04583	0.00081	0.31887	0.01808	0.05047	0.00289	289	5	281	14	217	98	289	5
sam.12	69.3	128.46	0.539468	0.04981	0.00126	0.36022	0.03652	0.05246	0.00541	313	8	312	27	306	183	313	8
sam.13	159.57	320.33	0.498143	0.05021	0.00086	0.36643	0.01991	0.05293	0.0029	316	5	317	15	326	92	316	5
sam.14	174.73	271.77	0.642933	0.05158	0.00106	0.36814	0.02716	0.05177	0.00387	324	6	318	20	275	131	324	6
sam.15	142.83	239.19	0.59714	0.05059	0.0009	0.36634	0.02141	0.05253	0.0031	318	6	317	16	309	101	318	6
sam.16	155.08	233.97	0.66282	0.04942	0.00093	0.34384	0.02387	0.05047	0.00354	311	6	300	18	217	123	311	6
sam.17	236.76	340.89	0.694535	0.05079	0.00088	0.36324	0.01947	0.05187	0.00281	319	5	315	15	280	91	319	5
sam.18	296.4	362.99	0.816551	0.04967	0.00158	0.36955	0.04514	0.05397	0.00674	312	10	319	33	370	217	312	10
sam.19	188.31	277.21	0.679304	0.04932	0.00088	0.36006	0.02115	0.05295	0.00314	310	5	312	16	327	101	310	5
sam.20	339.78	438.52	0.774834	0.04987	0.00148	0.36697	0.04118	0.05338	0.00612	314	9	317	31	345	199	314	9
sam.21	623.29	593.65	1.04993	0.0497	0.00099	0.36259	0.02338	0.05292	0.00347	313	6	314	17	325	110	313	6
sam.22	195.01	368.75	0.528841	0.05075	0.00098	0.36749	0.02376	0.05253	0.00345	319	6	318	18	309	112	319	6
sam.23	161.76	223.68	0.723176	0.0504	0.00143	0.36569	0.04028	0.05263	0.00591	317	9	316	30	313	196	317	9
sam.24	159.01	258.77	0.614484	0.04647	0.00116	0.34613	0.03101	0.05403	0.00494	293	7	302	23	372	157	293	7
sam.25	361.39	519.86	0.695168	0.04868	0.00104	0.3572	0.02582	0.05323	0.00392	306	6	310	19	339	125	306	6
sam.26	389.79	518.01	0.752476	0.04984	0.0008	0.37062	0.0154	0.05394	0.00226	314	5	320	11	369	65	314	5
sam.27	163.43	272.29	0.600206	0.04885	0.0009	0.35762	0.02141	0.0531	0.00322	307	6	310	16	333	102	307	6
sam.28	166.43	279.79	0.594839	0.04978	0.0009	0.35192	0.02115	0.05128	0.00312	313	6	306	16	253	105	313	6
sam.29	422.15	524.46	0.804923	0.0508	0.00081	0.36656	0.01565	0.05234	0.00225	319	5	317	12	300	68	319	5
sam.30	127.08	300.16	0.423374	0.04629	0.00108	0.33782	0.02857	0.05293	0.00456	292	7	296	22	326	150	292	7
sam.31	168.59	283.32	0.595052	0.04798	0.00113	0.34425	0.03021	0.05205	0.00465	302	7	300	23	288	156	302	7
sam.32	135.34	219.28	0.617202	0.05611	0.00273	0.41594	0.08984	0.05377	0.01183	352	17	353	64	361	360	352	17
sam.33	274.29	444.1	0.617631	0.04996	0.00109	0.35238	0.02781	0.05116	0.00411	314	7	307	21	248	139	314	7
sam.34	565.79	614.88	0.920163	0.04851	0.00095	0.34622	0.02246	0.05177	0.00341	305	6	302	17	275	113	305	6
sam.35	151.84	254.47	0.596691	0.049	0.00097	0.3485	0.02404	0.05158	0.00361	308	6	304	18	267	122	308	6
Metamorphic sandstone sample WC09-16-14(14)
sam.01	101.04	86.22	1.17189	0.53332	0.00791	13.2966	0.24611	0.18088	0.00306	2755	33	2701	17	2661	14	2661	14
sam.02	126.14	265.17	0.475695	0.5117	0.00692	12.2653	0.18128	0.17389	0.00219	2664	30	2625	14	2595	11	2595	11
sam.03	153.28	1517.47	0.10101	0.08216	0.00327	1.84196	0.37505	0.16259	0.03373	509	19	1061	134	2483	385
sam.04	56.9	134.48	0.423111	0.37388	0.00545	6.15831	0.12638	0.1195	0.0023	2048	26	1999	18	1949	18	1949	18
sam.05	74.44	146.43	0.508366	0.3668	0.00532	6.02999	0.1215	0.11926	0.00225	2014	25	1980	18	1945	17	1945	17
sam.06	70.55	161.78	0.436086	0.36493	0.00568	5.55248	0.13831	0.11038	0.00266	2005	27	1909	21	1806	24	1806	24
sam.07	62.67	354.12	0.176974	0.15342	0.00327	2.23853	0.12024	0.10582	0.00612	920	18	1193	38	1729	109	920	18
sam.08	104.21	417.35	0.249695	0.24908	0.00504	3.5817	0.19629	0.10429	0.00609	1434	26	1545	44	1702	110	1702	110
sam.09	212.88	554.64	0.383817	0.18706	0.00334	3.65702	0.14117	0.14179	0.00603	1105	18	1562	31	2249	75	2249	75
sam.10	35.77	47.26	0.756877	0.28735	0.00515	3.72622	0.13856	0.09407	0.00349	1628	26	1577	30	1510	43	1510	43
sam.11	256.06	328.28	0.780005	0.2542	0.00398	3.47636	0.13146	0.09919	0.00406	1460	20	1522	30	1609	78	1609	78
sam.12	31.98	55.32	0.578091	0.27118	0.008	3.59597	0.26889	0.09619	0.00734	1547	41	1549	59	1551	96	1551	96
sam.13	136.65	150.12	0.910272	0.48387	0.00788	10.8882	0.25318	0.16323	0.00362	2544	34	2514	22	2489	19	2489	19
sam.14	421.61	998.45	0.422265	0.07067	0.00098	0.54922	0.01334	0.05638	0.00132	440	6	444	9	467	30	440	6
sam.15	152.29	312.82	0.486829	0.2351	0.00376	3.11009	0.09059	0.09596	0.00276	1361	20	1435	22	1547	31	1547	31
sam.16	91.37	351.95	0.259611	0.34294	0.00559	5.91149	0.17078	0.12502	0.00415	1901	27	1963	25	2029	60	2029	60
sam.17	143.47	273.85	0.5239	0.23073	0.00398	2.95225	0.10329	0.09282	0.00325	1338	21	1395	27	1484	40	1484	40
sam.18	253.74	641.12	0.395776	0.12823	0.00276	1.9959	0.13294	0.11289	0.0079	778	16	1114	45	1846	130
sam.19	42.02	131.81	0.318792	0.49815	0.00769	12.4163	0.25127	0.1808	0.00341	2606	33	2636	19	2660	16	2660	16
sam.20	61.7	683.73	0.0902403	0.10991	0.00169	1.76396	0.06675	0.1164	0.00475	672	10	1032	25	1902	75
sam.21	239	1216.65	0.196441	0.08694	0.00134	1.4103	0.05416	0.11765	0.00487	537	8	893	23	1921	76
sam.22	139.87	592.85	0.235928	0.12007	0.00282	2.55239	0.16115	0.15418	0.01039	731	16	1287	46	2393	118
sam.23	95.66	910.8	0.105029	0.11149	0.00186	1.51613	0.09743	0.09863	0.00655	681	11	937	39	1598	127
sam.24	106.59	97.47	1.09357	0.37303	0.00579	6.29743	0.14987	0.12245	0.0028	2044	27	2018	21	1992	22	1992	22
sam.25	127.6	491.31	0.259714	0.11143	0.00186	1.9419	0.09095	0.12639	0.00629	681	11	1096	31	2048	90
sam.26	264.54	425.05	0.622374	0.37592	0.00518	6.80798	0.11245	0.13135	0.00192	2057	24	2087	15	2116	13	2116	13
sam.27	153.6	293.52	0.523303	0.2204	0.00339	2.82238	0.10515	0.09288	0.00374	1284	18	1361	28	1485	78	1485	78
sam.28	78.9	212.98	0.370457	0.15311	0.00237	2.81585	0.06972	0.13339	0.00325	918	13	1360	19	2143	23
sam.29	33.85	43.46	0.778877	0.5013	0.00937	11.4553	0.33421	0.16574	0.00472	2619	40	2561	27	2515	25	2515	25
sam.30	44.84	121.39	0.369388	0.50158	0.00741	11.5134	0.21539	0.16648	0.00284	2621	32	2566	17	2523	14	2523	14
sam.31	136.54	688.3	0.198373	0.08708	0.00183	1.65055	0.13999	0.13748	0.01201	538	11	990	54	2196	157
sam.32	77.9	191.04	0.407768	0.19721	0.00477	3.45527	0.39151	0.12707	0.01472	1160	26	1517	89	2058	213	2058	213
sam.33	107.94	216.65	0.498223	0.31873	0.00498	5.53454	0.15729	0.12594	0.00408	1784	24	1906	24	2042	59	2042	59
sam.34	50.4	147.38	0.341973	0.30847	0.00469	5.608	0.14188	0.13185	0.00389	1733	23	1917	22	2123	53	2123	53
sam.35	493	1421.19	0.346892	0.10755	0.00158	1.26984	0.046	0.08563	0.00335	659	9	832	21	1330	78
sam.36	368.42	1343.48	0.274228	0.07141	0.00164	1.78937	0.13615	0.18175	0.01444	445	10	1042	50	2669	136
sam.37	240.87	273.36	0.881146	0.2857	0.00725	4.74476	0.26038	0.12044	0.00674	1620	36	1775	46	1963	62	1963	62
sam.38	117.76	262.07	0.449346	0.16746	0.00247	1.66439	0.044	0.07208	0.00185	998	14	995	17	988	30	998	14
Quartz sandstone sample WC09-17-14(3)
sam.01	72.98	129.86	0.56199	0.0553	0.00101	0.39786	0.02486	0.05219	0.00331	347	6	340	18	294	109	347	6
sam.02	92.2	159.51	0.57802	0.05621	0.00107	0.40533	0.02679	0.05231	0.00351	353	7	346	19	299	116	353	7
sam.03	415.86	376.74	1.10384	0.0533	0.00182	0.41016	0.0544	0.05582	0.00757	335	11	349	39	445	235	335	11
sam.04	433.64	405.6	1.06913	0.05021	0.00105	0.36425	0.02727	0.05262	0.00401	316	6	315	20	312	132	316	6
sam.05	249.83	407.64	0.612869	0.05541	0.00125	0.39614	0.03261	0.05186	0.00435	348	8	339	24	279	146	348	8
sam.06	89.36	119.5	0.747782	0.05492	0.0015	0.39881	0.04312	0.05267	0.00581	345	9	341	31	315	194	345	9
sam.07	43.3	71.12	0.60883	0.05344	0.00178	0.38857	0.05398	0.05273	0.00747	336	11	333	39	317	252	336	11
sam.08	321.32	288.14	1.11515	0.05222	0.00095	0.39902	0.02329	0.05542	0.00329	328	6	341	17	429	98	328	6
sam.09	76.17	148.12	0.514245	0.05264	0.00099	0.38025	0.02533	0.05239	0.00354	331	6	327	19	302	118	331	6
sam.10	189.02	448.97	0.421008	0.05321	0.0009	0.39635	0.0203	0.05402	0.00281	334	6	339	15	372	85	334	6
sam.11	10.1	25.53	0.395613	0.05648	0.0022	0.41016	0.10086	0.05266	0.01307	354	13	349	73	314	401	354	13
sam.12	13.36	26.78	0.49888	0.05409	0.00389	0.4033	0.13768	0.05408	0.01879	340	24	344	100	374	518	340	24
sam.13	50.66	87.46	0.579236	0.05309	0.00128	0.38374	0.03877	0.05241	0.00538	333	8	330	28	303	184	333	8
sam.14	241.5	213.98	1.12861	0.05189	0.00097	0.38587	0.02412	0.05393	0.00343	326	6	331	18	368	107	326	6
sam.15	2010.92	2004.15	1.00338	0.04384	0.00061	0.41971	0.01215	0.06942	0.00201	277	4	356	9	911	37	277	4
sam.16	326.45	230.03	1.41916	0.05537	0.00094	0.40639	0.02103	0.05322	0.00279	347	6	346	15	338	86	347	6
sam.17	154.14	196.47	0.784547	0.05612	0.00092	0.41466	0.02077	0.05358	0.00272	352	6	352	15	353	83	352	6
sam.18	13.11	27.09	0.483942	0.05541	0.00301	0.40825	0.10436	0.05343	0.0139	348	18	348	75	347	401	348	18
sam.19	24.51	43.16	0.567887	0.05174	0.00162	0.41828	0.0541	0.05862	0.00773	325	10	355	39	553	231	325	10
sam.20	12.44	22.5	0.552889	0.05632	0.00712	0.39828	0.2484	0.05128	0.03252	353	43	340	180	253	916	353	43
sam.21	146.73	128.78	1.13938	0.05106	0.00095	0.41898	0.02659	0.0595	0.00383	321	6	355	19	585	106	321	6
sam.22	78.39	91.33	0.858316	0.05305	0.00134	0.38695	0.04137	0.05289	0.00574	333	8	332	30	324	195	333	8
sam.23	32.42	85.22	0.380427	0.05154	0.00192	0.37686	0.06015	0.05302	0.00863	324	12	325	44	330	287	324	12
sam.24	536.07	545.23	0.9832	0.02569	0.00065	0.37531	0.01571	0.10593	0.00496	164	4	324	12	1731	41	164	4
sam.25	579.99	800.83	0.724236	0.05579	0.00126	0.41657	0.03379	0.05414	0.00448	350	8	354	24	377	143	350	8
sam.26	60.86	157.76	0.385776	0.04765	0.00173	0.37591	0.05152	0.0572	0.00804	300	11	324	38	499	240	300	11
sam.27	51.74	57.95	0.892839	0.05571	0.00306	0.41451	0.09936	0.05394	0.01319	349	19	352	71	369	393	349	19
sam.28	14.53	31.7	0.45836	0.04261	0.0018	0.30716	0.07376	0.05227	0.0127	269	11	272	57	297	386	269	11
sam.29	94.68	154.12	0.614326	0.05589	0.0021	0.41535	0.06345	0.05389	0.00841	351	13	353	46	366	275	351	13
sam.30	190.96	338.92	0.563437	0.05332	0.0009	0.38997	0.02067	0.05303	0.00285	335	6	334	15	330	90	335	6
sam.31	289.57	269.98	1.07256	0.05212	0.00093	0.38187	0.02164	0.05312	0.00305	328	6	328	16	334	96	328	6
sam.32	43.5	56.41	0.77114	0.05471	0.00239	0.41645	0.07909	0.05518	0.01069	343	15	354	57	420	337	343	15
sam.33	128.91	180.28	0.715054	0.05046	0.00128	0.3801	0.03714	0.05461	0.00544	317	8	327	27	396	175	317	8
sam.34	103.62	101.08	1.02513	0.05169	0.00112	0.37616	0.03334	0.05276	0.00474	325	7	324	25	318	161	325	7
sam.35	170.78	186.01	0.918123	0.05278	0.00092	0.39101	0.02212	0.05371	0.00308	332	6	335	16	359	96	332	6
sam.36	102.49	169.21	0.605697	0.05346	0.00103	0.39398	0.02597	0.05343	0.00358	336	6	337	19	347	114	336	6
sam.37	93.36	194.83	0.479187	0.05375	0.00154	0.39254	0.0454	0.05294	0.00624	338	9	336	33	326	208	338	9
sam.38	272.93	186.4	1.46422	0.05449	0.00098	0.39668	0.02425	0.05278	0.00327	342	6	339	18	319	106	342	6
sam.39	100.06	197.65	0.506248	0.05476	0.001	0.40979	0.02601	0.05426	0.00349	344	6	349	19	382	110	344	6
sam.40	320.45	444.44	0.72102	0.05023	0.00073	0.37412	0.01293	0.054	0.00187	316	4	323	10	371	52	316	4
sam.41	37.5	50.87	0.737173	0.04776	0.00225	0.42202	0.07736	0.06406	0.01204	301	14	357	55	744	318	301	14
sam.42	330.51	480.45	0.687918	0.05004	0.00074	0.36546	0.01328	0.05295	0.00193	315	5	316	10	327	56	315	5
sam.43	287.81	444.5	0.647492	0.04917	0.00145	0.35068	0.04066	0.05171	0.00612	309	9	305	31	273	207	309	9
sam.44	15.77	25.51	0.618189	0.04381	0.00294	0.3101	0.10563	0.05132	0.01776	276	18	274	82	255	504	276	18
sam.45	15.93	28.62	0.556604	0.05786	0.00253	0.42302	0.10367	0.05301	0.01314	363	15	358	74	329	397	363	15
sam.46	516.51	548.02	0.942502	0.19385	0.0025	3.61636	0.05456	0.13525	0.00184	1142	13	1553	12	2167	12	2167	12
sam.47	331.16	322.94	1.02545	0.04862	0.00095	0.38256	0.02424	0.05705	0.00368	306	6	329	18	493	105	306	6
sam.48	93.94	115.58	0.81277	0.05457	0.00108	0.41012	0.02772	0.05448	0.00374	343	7	349	20	391	116	343	7
sam.49	372.68	478.16	0.779404	0.05384	0.00081	0.38582	0.01504	0.05195	0.00203	338	5	331	11	283	62	338	5
sam.50	19.46	33.08	0.588271	0.05273	0.00182	0.39551	0.06426	0.05438	0.00897	331	11	338	47	387	299	331	11
sam.51	237.58	268.9	0.883525	0.05096	0.00083	0.37556	0.01826	0.05343	0.00262	320	5	324	13	347	80	320	5
sam.52	72.39	104.35	0.693723	0.05693	0.00154	0.4061	0.04411	0.05172	0.00572	357	9	346	32	273	195	357	9
sam.53	98.26	182.31	0.538972	0.05074	0.00092	0.36961	0.02258	0.05281	0.00327	319	6	319	17	321	106	319	6
sam.54	161.07	309.76	0.519983	0.05276	0.001	0.40549	0.02514	0.05571	0.00351	331	6	346	18	441	104	331	6
sam.55	297.43	328.46	0.905529	0.05423	0.001	0.41052	0.02411	0.05488	0.00327	340	6	349	17	407	98	340	6
sam.56	114.67	113.75	1.00809	0.05288	0.00149	0.39212	0.04437	0.05376	0.0062	332	9	336	32	361	203	332	9
sam.57	66.17	109.86	0.602312	0.04269	0.0015	0.30908	0.04173	0.05249	0.00727	269	9	273	32	307	239	269	9
sam.58	214.19	271.68	0.788391	0.05444	0.00088	0.40287	0.01873	0.05365	0.00251	342	5	344	14	356	76	342	5
sam.59	32.08	88.14	0.363966	0.05263	0.00119	0.39268	0.03613	0.05409	0.00505	331	7	336	26	375	167	331	7
sam.60	35.65	84.84	0.420203	0.05573	0.00194	0.40719	0.06064	0.05297	0.00804	350	12	347	44	328	272	350	12
sam.61	98.38	106.33	0.925233	0.0544	0.00124	0.39966	0.03731	0.05326	0.00504	341	8	341	27	340	170	341	8
sam.62	206.13	276.37	0.745848	0.05199	0.00101	0.38	0.02451	0.053	0.00347	327	6	327	18	329	111	327	6
sam.63	63.21	107.16	0.589866	0.05241	0.00125	0.38512	0.03567	0.05328	0.00502	329	8	331	26	341	166	329	8
sam.64	293.92	255.84	1.14884	0.04723	0.00128	0.3434	0.03341	0.05271	0.00525	297	8	300	25	316	170	297	8
sam.65	336.59	768.18	0.438166	0.13189	0.00198	1.65994	0.05879	0.09128	0.00351	799	11	993	22	1453	75	799	11
sam.66	39.92	51.48	0.775447	0.05291	0.00195	0.3986	0.06995	0.05462	0.00973	332	12	341	51	397	321	332	12
sam.67	39.49	142.6	0.276928	0.05425	0.00114	0.41013	0.03218	0.05482	0.00436	341	7	349	23	405	139	341	7
sam.68	151.55	214.35	0.707021	0.05232	0.00088	0.37831	0.0197	0.05243	0.00275	329	5	326	15	304	88	329	5
sam.69	7.4	22.84	0.323993	0.05443	0.00278	0.40109	0.1182	0.05343	0.01593	342	17	342	86	347	463	342	17
sam.70	450.23	406.31	1.10809	0.04864	0.00082	0.36733	0.01799	0.05476	0.00271	306	5	318	13	402	79	306	5
sam.71	58.62	108.19	0.541825	0.05436	0.00257	0.39725	0.07997	0.05299	0.01089	341	16	340	58	328	334	341	16
sam.72	93.61	134.46	0.696192	0.0492	0.00127	0.3591	0.0369	0.05293	0.00554	310	8	312	28	326	184	310	8
sam.73	107.28	154.11	0.696126	0.05167	0.00108	0.3596	0.02943	0.05046	0.00418	325	7	312	22	216	146	325	7
sam.74	79.76	134.9	0.591253	0.05665	0.00111	0.42194	0.02949	0.05401	0.00382	355	7	357	21	371	122	355	7
sam.75	479.09	614.07	0.780188	0.04223	0.00081	0.41016	0.02227	0.07043	0.00391	267	5	349	16	941	80	267	5
sam.76	91.35	119.12	0.766874	0.05395	0.0015	0.40449	0.04395	0.05437	0.00602	339	9	345	32	386	194	339	9
sam.77	43.79	68.46	0.639644	0.055	0.00224	0.40941	0.0726	0.05398	0.00975	345	14	348	52	370	318	345	14
sam.78	11.59	21.92	0.528741	0.05486	0.0032	0.40085	0.1193	0.05299	0.01601	344	20	342	86	328	455	344	20
sam.79	38.1	49.9	0.763527	0.0551	0.00202	0.40422	0.07401	0.05319	0.00987	346	12	345	54	337	324	346	12
sam.80	83.3	359.15	0.231937	0.01347	0.00033	0.09718	0.01016	0.05232	0.00556	86	2	94	9	299	191	86	2
sam.81	70.51	114.1	0.617967	0.05635	0.00113	0.43035	0.03137	0.05538	0.00409	353	7	363	22	428	127	353	7
sam.82	60.93	106.9	0.569972	0.05312	0.00114	0.39528	0.03459	0.05396	0.00478	334	7	338	25	369	159	334	7
sam.83	67.61	113.32	0.596629	0.05251	0.00111	0.37558	0.03231	0.05187	0.00452	330	7	324	24	280	156	330	7
sam.84	822.12	1229.14	0.668858	0.05117	0.00077	0.40245	0.01377	0.05704	0.00195	322	5	343	10	493	49	322	5
sam.85	97.57	158.51	0.615545	0.05345	0.00124	0.39423	0.03505	0.05349	0.00483	336	8	337	26	350	160	336	8
sam.86	16.26	35.1	0.463248	0.05726	0.00191	0.39353	0.06033	0.04984	0.00776	359	12	337	44	188	264	359	12
sam.87	46.11	64.5	0.714884	0.04727	0.00336	0.33189	0.11702	0.05092	0.01825	298	21	291	89	237	509	298	21
sam.88	37.54	38.29	0.980413	0.07156	0.00204	0.48184	0.05985	0.04883	0.00616	446	12	399	41	140	222	446	12
sam.89	6.3	14.84	0.424528	0.06934	0.00297	0.52592	0.12979	0.05501	0.01372	432	18	429	86	413	416	432	18
sam.90	26.92	48.77	0.551979	0.05389	0.00162	0.3603	0.06252	0.04849	0.00849	338	10	312	47	123	291	338	10
sam.91	123.91	75.19	1.64796	0.06905	0.00296	0.52643	0.09457	0.0553	0.01013	430	18	429	63	424	322	430	18
sam.92	13.13	24.29	0.540552	0.05003	0.00223	0.36689	0.08443	0.05319	0.01242	315	14	317	63	337	377	315	14
sam.93	25.87	58.65	0.441091	0.05529	0.00174	0.41224	0.05455	0.05409	0.00729	347	11	350	39	375	239	347	11
sam.94	177.62	254.38	0.698247	0.05939	0.00107	0.44888	0.02446	0.05483	0.00302	372	7	376	17	405	90	372	7
sam.95	9.28	23.82	0.389589	0.05328	0.00282	0.39796	0.10601	0.05418	0.01466	335	17	340	77	379	424	335	17
sam.96	27.1	56.42	0.480326	0.05563	0.00153	0.41432	0.04777	0.05402	0.00633	349	9	352	34	372	209	349	9
sam.97	23.59	41.56	0.567613	0.05177	0.00195	0.37563	0.07445	0.05263	0.01057	325	12	324	55	313	341	325	12
sam.98	9.62	23.03	0.417716	0.06163	0.00387	0.41853	0.15468	0.04926	0.01841	386	23	355	111	160	535	386	23
sam.99	179.5	309.54	0.579893	0.05537	0.00126	0.3974	0.03225	0.05206	0.0043	347	8	340	23	288	143	347	8
sam.100	80.43	105.65	0.761287	0.05204	0.00138	0.37647	0.04225	0.05248	0.00598	327	8	324	31	306	204	327	8
